# Supplementary material for: Inter-rater agreement in evaluation of disability: systematic review of reproducibility studies
Source: PubMed Central journal article supplement — BMJ. 2017 Jan 25;356:j14. doi: 10.1136/bmj.j14 (PMC5283380; doi:10.1136/bmj.j14), 2017-01-25
Supplement: barj034817.ww1_default.pdf [file barj034817.ww1_default.pdf]

**Appendix 1:** Search strategy [posted as supplied by author]

**Database:** Ovid MEDLINE(R) In-Process & Other Non-Indexed Citations, Ovid MEDLINE(R) Daily and Ovid MEDLINE(R) <1946 to Present>

Search Strategy:

- 
- 1 "reproducibility of results"/ (294924)
  - 2 (reproducib\* adj3 result\*).mp. [mp=title, abstract, original title, name of substance word, subject heading word, keyword heading word, protocol supplementary concept word, rare disease supplementary concept word, unique identifier] (300587)
  - 3 observer variation/ (33540)
  - 4 ((kappa or kappas) adj3 (statistic\* or coefficient\* or rating or rater or Cohen\* or Fleiss\*)).mp. [mp=title, abstract, original title, name of substance word, subject heading word, keyword heading word, protocol supplementary concept word, rare disease supplementary concept word, unique identifier] (10664)
  - 5 (phi adj3 (statistic\* or coefficient\*)).mp. [mp=title, abstract, original title, name of substance word, subject heading word, keyword heading word, protocol supplementary concept word, rare disease supplementary concept word, unique identifier] (279)
  - 6 ((intra-class or intraclass) adj2 correlation).mp. (14724)
  - 7 ICC.mp. (10948)
  - 8 inter-rater.mp. (5239)
  - 9 interrater.mp. (5715)
  - 10 Fleiss.ti,ab. (310)
  - 11 interexaminer.mp. (644)
  - 12 inter-examiner.mp. (544)
  - 13 ((concordan\* or consisten\* or agreement) adj5 (recommend\* or assessment or judgement or evaluation)).mp. [mp=title, abstract, original title, name of substance word, subject heading word, keyword heading word, protocol supplementary concept word, rare disease supplementary concept word, unique identifier] (7716)
  - 14 or/1-13 (343098)
  - 15 \*Disability Evaluation/ (15037)
  - 16 \*Work Capacity Evaluation/ (2808)
  - 17 ((function\* or disability or capacity) adj (assessment or evaluation or limitation or impairment or determination)).mp. [mp=title, abstract, original title, name of substance word, subject heading word, keyword heading word, protocol supplementary concept word, rare disease supplementary concept word, unique identifier] (68487)
  - 18 or/15-17 (68487)
  - 19 14 and 18 (5536)
  - 20 Sick Leave/ (4174)
  - 21 "Insurance Claim Review"/ (4762)
  - 22 sick leave.mp. (6197)
  - 23 sick-listed.mp. (352)
  - 24 Occupational Diseases/ (76078)
  - 25 Rehabilitation, Vocational/ (8735)
  - 26 (work adj2 (related or ability or disability or fitness or limitation\* or capacity or return)).mp. [mp=title, abstract, original title, name of substance word, subject heading word, keyword heading word, protocol supplementary concept word, rare disease supplementary concept word, unique identifier] (29805)
  - 27 Return to Work/ (500)
  - 28 Retirement/ or early retirement.mp. (8345)
  - 29 exp Accidents/ (146424)
  - 30 accident\*.mp. (154678)
  - 31 exp Musculoskeletal Diseases/ (869147)
  - 32 musculoskeletal disorder\*.mp. (4431)
  - 33 exp Mental Disorders/ (1001034)
  - 34 exp Back Pain/ (30027)
  - 35 or/20-34 (2158556)
  - 36 19 and 35 (2499)

**Database: Embase <1974 to 2014 November 17>**

Search Strategy:

---

- 1 reproducibility/ (143643)
- 2 (reproducib\* adj3 result\*).mp. (11166)
- 3 observer variation/ (16432)
- 4 ((kappa or kappas) adj3 (statistic\* or coefficient\* or rating or rater or Cohen\* or Fleiss\*)).mp. (12589)
- 5 (phi adj3 (statistic\* or coefficient\*)).mp. (223)
- 6 ((intra-class or intraclass) adj2 correlation).mp. (16391)
- 7 ICC.mp. (13875)
- 8 inter-rater.mp. (6960)
- 9 inter-rater.mp. (9936)
- 10 Fleiss.ti,ab. (462)
- 11 interexaminer.mp. (638)
- 12 inter-examiner.mp. (546)
- 13 ((concordan\* or consisten\* or agreement) adj5 (recommend\* or assessment or judgement or evaluation)).mp. (10171)
- 14 or/1-13 (206569)
- 15 \*disability/ (20147)
- 16 \*work capacity/ (4181)
- 17 ((function\* or disability or capacity) adj (assessment or evaluation or limitation or impairment or determination)).mp. (81952)
- 18 or/15-17 (103296)
- 19 14 and 18 (3337)
- 20 medical leave/ (3591)
- 21 insurance/ (36921)
- 22 sick leave.mp. (4284)
- 23 sick-listed.mp. (369)
- 24 occupational disease/ or work disability/ (57264)
- 25 vocational rehabilitation/ (8477)
- 26 (work adj2 (related or ability or disability or fitness or limitation\* or capacity or return)).mp. (40704)
- 27 return to work/ (1187)
- 28 work resumption/ (3378)
- 29 retirement/ or early retirement.mp. (11228)
- 30 exp accident/ (147388)
- 31 accident\*.mp. (267411)
- 32 exp musculoskeletal disease/ (1625797)
- 33 musculoskeletal disorder\*.mp. (5554)
- 34 exp mental disease/ (1582837)
- 35 exp backache/ (70682)
- 36 or/20-35 (3502970)
- 37 19 and 36 (1405)

**Database: PsycINFO <1806 to November Week 2 2014>**

Search Strategy:

---

- 1 test validity/ (55663)
- 2 test reliability/ (39260)
- 3 (reproducib\* adj3 result\*).mp. [mp=title, abstract, heading word, table of contents, key concepts, original title, tests & measures] (211)
- 4 inter-rater reliability/ (2697)
- 5 observer variation.mp. (16)
- 6 "clinical judgment (not diagnosis)"/ (4559)
- 7 ((kappa or kappas) adj3 (statistic\* or coefficient\* or rating or rater or Cohen\* or Fleiss\*)).mp. [mp=title, abstract, heading word, table of contents, key concepts, original title, tests & measures] (1376)
- 8 (phi adj3 (statistic\* or coefficient\*)).mp. [mp=title, abstract, heading word, table of contents, key concepts, original title, tests & measures] (259)

- 9 ((intra-class or intraclass) adj2 correlation).mp. [mp=title, abstract, heading word, table of contents, key concepts, original title, tests & measures] (2616)
- 10 ICC.mp. (1561)
- 11 inter-rater.mp. (2610)
- 12 inter-rater.mp. (5753)
- 13 Fleiss.ti,ab. (72)
- 14 interexaminer.mp. (34)
- 15 inter-examiner.mp. (34)
- 16 ((concordan\* or consisten\* or agreement) adj5 (recommend\* or assessment or judgement or evaluation)).mp. [mp=title, abstract, heading word, table of contents, key concepts, original title, tests & measures] (2707)
- 17 or/1-16 (79380)
- 18 disability evaluation/ (399)
- 19 vocational evaluation/ (299)
- 20 Work Capacity Evaluation.mp. (5)
- 21 ((function\* or disability or capacity) adj (assessment or evaluation or limitation or impairment or determination)).mp. [mp=title, abstract, heading word, table of contents, key concepts, original title, tests & measures] (11777)
- 22 or/18-21 (12056)
- 23 17 and 22 (1004)
- 24 employee leave benefits/ (729)
- 25 health insurance/ or employee health insurance/ (3559)
- 26 sick leave.mp. (964)
- 27 sick-listed.mp. (117)
- 28 occupational health/ or occupational exposure/ or work related illnesses/ (2892)
- 29 exp vocational rehabilitation/ (6155)
- 30 disability management/ (315)
- 31 (work adj2 (related or ability or disability or fitness or limitation\* or capacity or return)).mp. [mp=title, abstract, heading word, table of contents, key concepts, original title, tests & measures] (13789)
- 32 reemployment/ (986)
- 33 exp Retirement/ or early retirement.mp. (3579)
- 34 exp accidents/ (10057)
- 35 accident\*.mp. (35806)
- 36 exp musculoskeletal disorders/ (12785)
- 37 musculoskeletal disease\*.mp. (103)
- 38 exp mental disorders/ (451848)
- 39 back pain/ (2885)
- 40 or/24-39 (522936)
- 41 23 and 40 (387)
