# Supplementary material for: Inter-rater agreement in evaluation of disability: systematic review of reproducibility studies
Source: PubMed Central journal article supplement — BMJ. 2017 Jan 25;356:j14. doi: 10.1136/bmj.j14 (PMC5283380; doi:10.1136/bmj.j14), 2017-01-25
Supplement: barj034817.ww3_default.pdf [file barj034817.ww3_default.pdf]

Appendix 3: Studies reporting the use of an instrument with instruments referenced [posted as supplied by author]

1. Schellart et al: List of Functional Abilities (LFA). Claim Beoordelings- en BorgingsSysteem (CBBS). Amsterdam: Landelijk Instituut Sociale Verzekeringen (LISV); 2002.
  2. Slebus et al: Work Ability Checklist for patients with major depressive disorders. In: Slebus FG, Kuijer PP, Willems JH, Frings-Dresen MH, Sluiter JK. Work ability in sick-listed patients with major depressive disorder. *Occup Med (Lond)* 2008;58:475–479.
  3. Spanjer et al: DASI Interview. Spanjer J. Belastbaarheid gerichte beoordeling, beschrijving van een beoordelingsmethodiek [Dutch]. 2004. Copy available from the author]; Functional Information System [Functie Information Systeem. Naslag gevalsbehandeling [Dutch]. The Netherlands: Lisv. Bohn, Stafleu, van Loghum Houten/Diegem; 1996.]; Mental Ability List [Spanjer J. De praktische concretisering van psychische belastbaarheid [Dutch]. *Tijdschrift voor Bedrijfs- en Verzekeringsgeneeskunde* 1996;5:182 – 186.
  4. Spanjer et al: ClaimBeoordelings – en BorgingsSysteem (CBBS) [Functional Ability List]. Amsterdam: Landelijk Instituut Sociale Verzekeringen (LISV); 2002 [Dutch].
  5. Spanjer et al: DASI Interview. Spanjer J. Disability Assessment Structured Interview (DASI), description of an assessment method. Zuidlaren, the Netherlands, 2007. Copy available from the author.
- 
1. Schellart AJ, Zwerver F, Anema JR, Van der Beek AJ. The influence of applying insurance medicine guidelines for depression on disability assessments. *BMC research notes*. 2013;6:225.
  2. Slebus FG, Kuijer PP, Willems JH, Frings-Dresen MH, Sluiter JK. Work ability in sick-listed patients with major depressive disorder. *Occupational medicine*. 2008;58(7):475-9.
  3. Spanjer J, Krol B, Brouwer S, Groothoff JW. Inter-rater reliability in disability assessment based on a semi-structured interview report. *Disabil Rehabil*. 2008;30(24):1885-90.
  4. Spanjer J, Krol B, Popping R, Groothoff JW, Brouwer S. Disability assessment interview: the role of detailed information on functioning in addition to medical history-taking. *Journal of rehabilitation medicine*. 2009;41(4):267-72.
  5. Spanjer J, Krol B, Brouwer S, Popping R, Groothoff JW, van der Klink JJ. Reliability and validity of the Disability Assessment Structured Interview (DASI): a tool for assessing functional limitations in claimants. *Journal of occupational rehabilitation*. 2010;20(1):33-40.
