# Supplementary material for: Inter-rater agreement in evaluation of disability: systematic review of reproducibility studies
Source: PubMed Central journal article supplement — BMJ. 2017 Jan 25;356:j14. doi: 10.1136/bmj.j14 (PMC5283380; doi:10.1136/bmj.j14), 2017-01-25
Supplement: barj034817.ww4_default.pdf [file barj034817.ww4_default.pdf]

**Appendix 4:** Performance of study and study findings (long) [posted as supplied by author]

| Author, year             | Number of ... Raters / Cases Total / Cases per rater / Raters per case      | Instrument                                                                                                                                                                                                                                                                                 | Outcome and Scale                                                                                                                        | Reliability Statistic                                         | Results                                                                                                                                                                                                                                                                                                                                                                                                                                                                            | Interrater Reliability           |
|--------------------------|-----------------------------------------------------------------------------|--------------------------------------------------------------------------------------------------------------------------------------------------------------------------------------------------------------------------------------------------------------------------------------------|------------------------------------------------------------------------------------------------------------------------------------------|---------------------------------------------------------------|------------------------------------------------------------------------------------------------------------------------------------------------------------------------------------------------------------------------------------------------------------------------------------------------------------------------------------------------------------------------------------------------------------------------------------------------------------------------------------|----------------------------------|
| <b>Insurance Setting</b> |                                                                             |                                                                                                                                                                                                                                                                                            |                                                                                                                                          |                                                               |                                                                                                                                                                                                                                                                                                                                                                                                                                                                                    |                                  |
| de Kort, 1992(5)         | a) Among 5 raters or b) 5 raters vs. decision of government / 180 / 180 / 5 | Professional expertise of raters. Records include: <ul style="list-style-type: none"> <li>• Structured presentation of job specification.</li> <li>• Comprehensive medical questionnaire (by patient).</li> <li>• Medical examination form (by doctor).</li> </ul> No specific instrument. | Global rating of 'Fit for Work'.<br><br>Three categories: Fit / doubt / unfit for job                                                    | Percentage agreement; kappa. Precision presented.             | Agreement <sub>Fit for work</sub> among panel physicians<br>Any disorder: Agreement 69%; kappa 0.38 (SD 0.06);<br>Musculoskeletal: Agreement 66%; kappa 0.38 (SD 0.11);<br>Mental disorder: Agreement 58%; kappa 0.24 (SD 0.11);<br><br>Agreement <sub>Fit for work panel vs government</sub> <sup>a</sup><br>Any disorder: Agreement 63%; kappa 0.35 (SD 0.07);<br>Musculoskeletal: Agreement 64%; kappa 0.34 (SD 0.14);<br>Mental disorder: Agreement 61%; kappa 0.33 (SD 0.22); | Kappa poor<br><br>Agreement poor |
| Dell-Kuster, 2014(4)     | Unclear / 3562 / unclear / 2                                                | Professional expertise of raters. No specific instrument.                                                                                                                                                                                                                                  | Global rating of 'Work Ability'.<br>Scale from 100% to 0%                                                                                | Percentage agreement. No precision.                           | Overall agreement among experts and physicians<br>- Last job: 51%.<br>- Suitable alternative work: 20%.<br>Experts approved higher level of work ability than did treating physicians.                                                                                                                                                                                                                                                                                             | Agreement poor                   |
| Dickmann 2007(11)        | 22 / 1 / 1 / 22                                                             | Professional expertise of raters. No specific instrument.                                                                                                                                                                                                                                  | 'Work Ability' in the last job and in suitable alternative work.<br>Three categories: < 3 hrs; 3 to 6 hrs; ≥ 6 hrs.                      | Narrative in the text or in descriptive tables. No precision. | Frequency <sub>Work ability last job</sub><br><3hrs: 27%; 3 to 6hrs: 36%; ≥ 6 hrs: 37%<br><br>Frequency <sub>Work ability alternative work</sub><br><3hrs: 18%; 3 to 6hrs: 32%; ≥ 6 hrs: 50%;                                                                                                                                                                                                                                                                                      | Descriptive: Agreement poor      |
| Elder, 1994(13)          | 35 / 10 / 10 / 35                                                           | Professional expertise of raters. No specific instrument.                                                                                                                                                                                                                                  | Approval or decline of application for early retirement due to ill health. Four categories: Accept / reject / other action / no response | Weighted kappa. Precision presented.                          | Kappa <sub>Early retirement</sub> 0.24 (SE 0.03) <sup>b</sup>                                                                                                                                                                                                                                                                                                                                                                                                                      | Kappa poor                       |
| Ikezawa, 2010(9)         | 36 / 3 / 3 / 36                                                             | Professional expertise of raters. Standardized questionnaire based on Alberta's current Workers' Compensation Board (WCB)                                                                                                                                                                  | 'Return to work' recommendation.<br><br>Three categories:                                                                                | Percentage agreement; kappa. No precision.                    | RTW recommendations to modified duties:<br>Global agreement <sub>RTW recommendation</sub> 82.4%<br><br>Agreement <sub>RTW fracture</sub> 97%                                                                                                                                                                                                                                                                                                                                       | Agreement good                   |

| Author, year        | Number of ... Raters / Cases Total / Cases per rater / Raters per case | Instrument                                                                                                                                   | Outcome and Scale                                                                                                                                                                                                                                     | Reliability Statistic                                            | Results                                                                                                                                                                                                                                                                                                                                   | Interrater Reliability                      |
|---------------------|------------------------------------------------------------------------|----------------------------------------------------------------------------------------------------------------------------------------------|-------------------------------------------------------------------------------------------------------------------------------------------------------------------------------------------------------------------------------------------------------|------------------------------------------------------------------|-------------------------------------------------------------------------------------------------------------------------------------------------------------------------------------------------------------------------------------------------------------------------------------------------------------------------------------------|---------------------------------------------|
|                     |                                                                        | outcome reporting requirements                                                                                                               | Return to previous work / return to modified work / no return to work                                                                                                                                                                                 |                                                                  | Agreement RTW dislocation 94%<br>Agreement RTW chronic back pain 56%                                                                                                                                                                                                                                                                      |                                             |
| Ingravallo, 2008(2) | 4 / 15 / 15 / 4                                                        | Professional expertise of the members of the Medical Commissions.<br>No specific instrument.                                                 | a) Decision on disability benefit<br>Percentage disability on a scale from 0% to 100%.<br>b) Three categories on severity of handicap:<br>No handicap / handicap / severe handicap                                                                    | Percentage agreement;<br>kappa.<br>Precision presented.          | Disability decision<br>Agreement Disability benefit range 20% to 53%<br>Kappa Disability benefit range -0.10 [95% CI: -0.28 to 0.07] to 0.35 [95% CI: 0.01 to 0.69]<br>Handicap decision<br>Agreement Severity handicap range 13.3% to 60%<br>Kappa Severity handicap range -0.26 [95% CI: -0.36 to 0.15] to 0.36 [95% CI: 0.039 to 0.68] | Kappa poor<br>Agreement poor                |
| Lax, 2004(7)        | 2 / 23 / 23 / 2 <sup>c</sup>                                           | Professional expertise of the occupational health center (OHC) examiner and the independent medical expert (IME).<br>No specific instrument. | Agreement among OHC examiner and IME on four disability items:<br>- presence or absence<br>- partial or total<br>- temporary or permanent<br>- apportioned between work and non-work related.<br>Three categories:<br>Full / partial / dis-agreement. | Narrative in the text or in descriptive tables.<br>No precision. | Full agreement Four disability items 4%<br>Partial agreement Four disability items 34%<br>Disagreement Four disability items 78%<br><br>Direction of experts' disagreement favours insurers.                                                                                                                                              | Descriptive:<br>Agreement poor              |
| Lederer, 1998(8)    | 103 / 1 / 1 / 103 <sup>d</sup>                                         | General instructions for disability assessments by public health physicians.<br>Professional expertise of raters.<br>No specific instrument. | 'Fit for Work' evaluation.<br>Two categories:<br>Yes vs. No.                                                                                                                                                                                          | Narrative in the text or in descriptive tables.<br>No precision. | Frequency Remaining work ability 91.2%<br>Of 94 judgements with limited work ability<br>Frequency Limitations in work performance 86%<br>Frequency Reduction in working hours 56%                                                                                                                                                         | Descriptive:<br>Agreement good <sup>e</sup> |
| Okpaku, 1994(10)    | 6 / 144 / 48 to 129 / 2 to 6                                           | Professional expertise of mental health workers.<br>Criteria of the Social Security Administration (SSA).<br>No specific instrument.         | Approval for Social Security Benefit.<br><br>SSA: Two categories: Yes vs. No.<br><br>Mental health workers (Team): Four categories: Yes / maybe / no / undecided.                                                                                     | Narrative in the text or in descriptive tables.<br>No precision. | Team No (20/144) SSA Yes (11/20)<br>Team Yes (56/144) SSA Yes (49/56)<br>Team Maybe (29/144) SSA Yes (23/29)<br>Team Undecided (39/144) SSA Yes (31/39)<br>Agreement Yes / No decisions 40%<br>Direction of mental health workers' disagreement favours insurer.                                                                          | Descriptive:<br>Poor                        |
| Rudbeck, 2011(14)   | 11 / 8 / 8 / 11                                                        | Professional expertise of raters.<br>No specific instrument.                                                                                 | Health related work ability.<br><br>Four categories:                                                                                                                                                                                                  | Weighted kappa.<br>No precision.                                 | Kappa Work ability 0.33                                                                                                                                                                                                                                                                                                                   | Kappa poor                                  |

| Author, year        | Number of ... Raters / Cases Total / Cases per rater / Raters per case | Instrument                                                                                                                                                 | Outcome and Scale                                                                                                                                                    | Reliability Statistic                                                                  | Results                                                                                                                                                                                                                                                                                                                                                                                                                                                                                                         | Interrater Reliability           |
|---------------------|------------------------------------------------------------------------|------------------------------------------------------------------------------------------------------------------------------------------------------------|----------------------------------------------------------------------------------------------------------------------------------------------------------------------|----------------------------------------------------------------------------------------|-----------------------------------------------------------------------------------------------------------------------------------------------------------------------------------------------------------------------------------------------------------------------------------------------------------------------------------------------------------------------------------------------------------------------------------------------------------------------------------------------------------------|----------------------------------|
|                     |                                                                        |                                                                                                                                                            | Intact / slightly reduced / much reduced / extremely reduced.                                                                                                        |                                                                                        |                                                                                                                                                                                                                                                                                                                                                                                                                                                                                                                 |                                  |
| Schellart, 2013(12) | 40 / 4 / 4 / 40                                                        | Professional expertise of raters. List of Functional Abilities (LFA), with mental abilities, general physical abilities including manual skills, autonomy. | LFA sum score based on four scales 'Mental Abilities', 'General Physical Ability', 'Autonomy' and 'Working Hours'. No information about ability and autonomy scales. | Intraclass correlation. Precision presented.                                           | Pre-intervention<br>ICC <sub>LFA sum score</sub> 0.64 [95% CI 0.32 to 0.83]<br>Pre-control<br>ICC <sub>LFA sum score</sub> 0.65 [95% CI 0.33 to 0.84]<br>Post-intervention<br>ICC <sub>LFA sum score</sub> 0.69 [95% CI 0.37 to 0.86]<br>Post-control<br>ICC <sub>LFA sum score</sub> 0.54 [95% CI 0.21 to 0.76]                                                                                                                                                                                                | ICC good                         |
| Schreuder, 2012(15) | 5 / 132 / 132 / 5                                                      | Professional expertise of raters. No specific instrument.                                                                                                  | Readiness and ability of employee to return to work. Two categories: High vs. low                                                                                    | Percentage agreement.<br><br>Mean of kappa values of 10 pairs of raters. No precision. | Any disorder<br>Agreement <sub>Ability</sub> 57%; kappa <sub>Ability</sub> 0.14<br>Agreement <sub>Willingness</sub> 63%; kappa <sub>Willingness</sub> 0.25<br><br>Mental disorders<br>Agreement <sub>Ability</sub> 55%; kappa <sub>Ability</sub> 0.05<br>Agreement <sub>Willingness</sub> 58%; kappa <sub>Willingness</sub> 0.18<br><br>Musculoskeletal disorders<br>Agreement <sub>Ability</sub> 59%; kappa <sub>Ability</sub> 0.22<br>Agreement <sub>Willingness</sub> 68%; kappa <sub>Willingness</sub> 0.38 | Kappa poor<br><br>Agreement poor |
| Slebus, 2010(16)    | 51 / 5 / 5 / 25 to 26                                                  | Professional expertise of raters. Checklist for work ability.                                                                                              | Global rating of work ability. Percentage work ability on a scale from 0% ('no work ability') to 100% ('work ability as before the depressive episode')              | Intraclass correlation. No precision.                                                  | ICC <sub>Work ability</sub> 0.64                                                                                                                                                                                                                                                                                                                                                                                                                                                                                | ICC good                         |
| Spanjer, 2008(18)   | 12 / 12 / 12 / 12                                                      | Professional expertise of raters. DASI-interview; Functional Information System (FIS); Mental Ability List (MAL).                                          | Reduction in working hours. Hours per day.                                                                                                                           | Kappa and precision. <sup>f</sup>                                                      | Kappa <sub>Reduction in working hours</sub> 0.80 (0.55–0.94)                                                                                                                                                                                                                                                                                                                                                                                                                                                    | Kappa excellent                  |
| Spanjer, 2009(3)    | 27 / 30 / 30 / 27                                                      | Professional expertise of raters. Functional Ability List (FAL).                                                                                           | Reduction in working hours. Hours per day.                                                                                                                           | Kappa and precision. <sup>f</sup>                                                      | Kappa <sub>Reduction in working hours</sub> 0.86 (0.75–0.94)                                                                                                                                                                                                                                                                                                                                                                                                                                                    | Kappa excellent                  |
| Spanjer, 2010(6)    | 16 / 62 / 29 / 2                                                       | Control: Professional expertise of raters.                                                                                                                 | Reduction in working hours. Hours per day.                                                                                                                           | Intraclass correlation. <sup>f</sup>                                                   | ICC <sub>Reduction in working hours</sub> 0.53                                                                                                                                                                                                                                                                                                                                                                                                                                                                  | ICC fair                         |

| Author, year            | Number of ... Raters / Cases Total / Cases per rater / Raters per case | Instrument                                                                                                                                                                                        | Outcome and Scale                                                                                                                                                                                     | Reliability Statistic                        | Results                                                                                                                                                                                                                                                            | Interrater Reliability |
|-------------------------|------------------------------------------------------------------------|---------------------------------------------------------------------------------------------------------------------------------------------------------------------------------------------------|-------------------------------------------------------------------------------------------------------------------------------------------------------------------------------------------------------|----------------------------------------------|--------------------------------------------------------------------------------------------------------------------------------------------------------------------------------------------------------------------------------------------------------------------|------------------------|
|                         |                                                                        | Functional Ability List (FAL).<br>Intervention: DASI-interview added.                                                                                                                             |                                                                                                                                                                                                       |                                              |                                                                                                                                                                                                                                                                    |                        |
| <b>Research setting</b> |                                                                        |                                                                                                                                                                                                   |                                                                                                                                                                                                       |                                              |                                                                                                                                                                                                                                                                    |                        |
| Berns, 2007(19)         | Unclear / 49 / unclear / 2                                             | Multidimensional Scale of Independent Functioning, here: Bipolar Disorders. Semi-structured interview instrument. Professional expertise ('psychiatrists').                                       | Global rating about functioning within the work environment, reflecting ratings on role, level of support and performance.<br><br>7-item Likert scale (1 = normal functioning; 7 = total disability). | Intraclass correlation. No precision.        | ICC <sub>Work functioning</sub> 0.86<br>Subdomains<br>- ICC <sub>Role</sub> 0.87<br>- ICC <sub>Support</sub> 0.99<br>- ICC <sub>Performance</sub> 0.99                                                                                                             | ICC excellent          |
| Chopra, 2002(20)        | 2 / 20 / 20 / 2                                                        | Semistructured interview based on the ICIDH-2 checklist, with a single item 'remunerative employment'. Professional expertise (clinicians).                                                       | Global rating for remunerative employment.<br><br>5-item scale (no / mild / moderate / severe / complete or extreme problem).                                                                         | Kappa. No precision.                         | Weighted kappa <sub>Remunerative employment</sub> 0.62                                                                                                                                                                                                             | Kappa good             |
| Daradkeh, 1994(21)      | 2 / 42 / 42 / 2                                                        | Axis V (disabilities) of the ICD 10 with a single item 'Occupational Functioning'. Professional expertise (psychiatrists).                                                                        | Occupational functioning.<br><br>6-point scale from "no dysfunction" to "maximum dysfunction".                                                                                                        | Weighted kappa. No precision.                | Kappa <sub>Occupational functioning</sub> 0.53                                                                                                                                                                                                                     | Kappa fair             |
| Hannula, 2006(22)       | 4 / 39 / 39 / 4                                                        | Occupational Functioning Scale. One-item rating scale, anchored every ten points with a description of a patient's state at that point. Professional expertise (3 psychiatrists, 1 psychologist). | Occupational functioning. Scale from 100 to 0, anchored at every 10 points, higher values indicate better functioning.                                                                                | Intraclass correlation. Precision presented. | Overall agreement between 4 raters<br>ICC <sub>Occupational functioning</sub> 0.91 (0.86-0.95)                                                                                                                                                                     | ICC excellent          |
| Hill, 1989(23)          | 3 / 21 / 21 / 3                                                        | Adult Personality Functioning Assessment where work is 1 out of 6 domains of functioning. Assessment based on a standardised interview developed by the authors. Professional expertise (2        | Dysfunctioning in work as a social role.<br><br>6-point scale from 0 to 5, higher values indicate worse functioning.                                                                                  | Intraclass correlation. Precision presented. | ICC <sub>Work functioning</sub> 0.76 [95% CI, lower limit: 0.61]<br>Pairs of raters:<br>- Raters 1 vs. 2: ICC <sub>Work functioning</sub> 0.74<br>- Raters 1 vs. 3: ICC <sub>Work functioning</sub> 0.77<br>- Raters 2 vs. 3: ICC <sub>Work functioning</sub> 0.77 | ICC excellent          |

| Author, year    | Number of ...<br>Raters / Cases<br>Total / Cases<br>per rater /<br>Raters per case | Instrument                                                                                                                                                                                       | Outcome and Scale                                                                                                        | Reliability<br>Statistic                        | Results                                 | Interrater<br>Reliability |
|-----------------|------------------------------------------------------------------------------------|--------------------------------------------------------------------------------------------------------------------------------------------------------------------------------------------------|--------------------------------------------------------------------------------------------------------------------------|-------------------------------------------------|-----------------------------------------|---------------------------|
|                 |                                                                                    | psychiatrists, 1 researcher).                                                                                                                                                                    |                                                                                                                          |                                                 |                                         |                           |
| Mundo, 2010(24) | 18 / 180 / 11 to<br>41 / 2                                                         | Kennedy Axis V multi-dimensional scale with work as 1 of 7 subscales of functioning. Professional expertise (psychiatrists, psychologists, psychotherapists, other mental health professionals). | Occupational skills Scale from 100 to 0, anchored at every 10 points, higher values indicate better occupational skills. | Intraclass correlation. No precision presented. | ICC <sub>Occupational skills</sub> 0.75 | ICC excellent             |
| Nozu, 1995(25)  | 3 / 20 / 20 / 3                                                                    | Work-Personality Insufficiency (WPI) Rating Scale. Professional expertise (experts in occupational rehabilitation).                                                                              | Employability                                                                                                            | Intraclass correlation. No precision presented. | ICC <sub>Employability</sub> 0.88       | ICC excellent             |

**Abbreviations:** IRR = Interrater Reliability; RTW = Return To Work; ICC = Intraclass Coefficient.

<sup>a</sup> This study compared two different perspectives on the client in one sub-analysis.

<sup>b</sup> Kappa analysis restricted to 'accept'/'reject' options.

<sup>c</sup> In this study, 23 patients were assessed. Some were examined more than once leading to 27 examinations.

<sup>d</sup> The numbers were adjusted for the available information in the study.

<sup>e</sup> The importance of outcomes for decision making (remaining work ability > limitations in work performance > reduction in working hours) determined the global judgement.

<sup>f</sup> Raw data provided by the author allowed to calculate kappa and ICC on working hours.

1. Edwards W. The theory of decision making. *Psychological bulletin*. 1954;51(4):380-417.
2. Ingravallo F, Vignatelli L, Brini M, Brugaletta C, Franceschini C, Lugaresi F, et al. Medico-legal assessment of disability in narcolepsy: an interobserver reliability study. *Journal of sleep research*. 2008;17(1):111-9.
3. Spanjer J, Krol B, Popping R, Groothoff JW, Brouwer S. Disability assessment interview: the role of detailed information on functioning in addition to medical history-taking. *Journal of rehabilitation medicine*. 2009;41(4):267-72.
4. Dell-Kuster S, Lauper S, Koehler J, Zwimpfer J, Altermatt B, Zwimpfer T, et al. Assessing work ability--a cross-sectional study of interrater agreement between disability claimants, treating physicians, and medical experts. *Scandinavian journal of work, environment & health*. 2014;40(5):493-501.
5. de Kort WL, Uiterweer HW, van Dijk FJ. Agreement on medical fitness for a job. *Scandinavian journal of work, environment & health*. 1992;18(4):246-51.
6. Spanjer J, Krol B, Brouwer S, Popping R, Groothoff JW, van der Klink JJ. Reliability and validity of the Disability Assessment Structured Interview (DASI): a tool for assessing functional limitations in claimants. *Journal of occupational rehabilitation*. 2010;20(1):33-40.
7. Lax MB, Manetti FA, Klein RA. Medical evaluation of work-related illness: evaluations by a treating occupational medicine specialist and by independent medical examiners compared. *Int J Occup Environ Health*. 2004;10(1):1-12.
8. Lederer P, Pfaff G, Walter K, Weihrauch M, Weber A. [Quality circles in expert assessment as an instrument in quality management]. *Gesundheitswesen*. 1998;60(7):415-9.
9. Ikezawa Y, Battie MC, Beach J, Gross D. Do clinicians working within the same context make consistent return-to-work recommendations? *Journal of occupational rehabilitation*. 2010;20(3):367-77.
10. Okpaku SO, Sibulkin AE, Schenzler C. Disability determinations for adults with mental disorders: Social Security Administration vs independent judgments. *American journal of public health*. 1994;84(11):1791-5.
11. Dickmann JR, Broocks A. [Psychiatric expert opinion in case of early retirement--how reliable?]. *Fortschr Neurol Psychiatr*. 2007;75(7):397-401.
12. Schellart AJ, Zwerver F, Anema JR, Van der Beek AJ. The influence of applying insurance medicine guidelines for depression on disability assessments. *BMC research notes*. 2013;6:225.
13. Elder AG, Symington IS, Symington EH. Do occupational physicians agree about ill-health retiral? A study of simulated retirement assessments. *Occupational medicine*. 1994;44(5):231-5.
14. Rudbeck M, Fonager K. Agreement between medical expert assessments in social medicine. *Scand J Public Health*. 2011;39(7):766-72.
15. Schreuder JA, Roelen CA, de Boer M, Brouwer S, Groothoff JW. Inter-physician agreement on the readiness of sick-listed employees to return to work. *Disabil Rehabil*. 2012;34(21):1814-9.
16. Slebus FG, Kuijer PP, Willems JH, Frings-Dresen MH, Sluiter JK. Work ability assessment in prolonged depressive illness. *Occupational medicine*. 2010;60(4):307-9.
17. Slebus FG, Kuijer PP, Willems JH, Frings-Dresen MH, Sluiter JK. Work ability in sick-listed patients with major depressive disorder. *Occupational medicine*. 2008;58(7):475-9.
18. Spanjer J, Krol B, Brouwer S, Groothoff JW. Inter-rater reliability in disability assessment based on a semi-structured interview report. *Disabil Rehabil*. 2008;30(24):1885-90.
19. Berns S, Uzelac S, Gonzalez C, Jaeger J. Methodological considerations of measuring disability in bipolar disorder: validity of the Multidimensional Scale of Independent Functioning. *Bipolar disorders*. 2007;9(1-2):3-10.

20. Chopra P, Couper J, Herrman H. The assessment of disability in patients with psychotic disorders: an application of the ICDH-2. *The Australian and New Zealand journal of psychiatry*. 2002;36(1):127-32.
21. Daradkeh TK, Saad A. The reliability and validity of the proposed axis V (disabilities) of ICD-10. *The British journal of psychiatry : the journal of mental science*. 1994;165(5):683-5.
22. Hannula JA, Lahtela K, Jarvikoski A, Salminen JK, Makela P. Occupational Functioning Scale (OFS)--an instrument for assessment of work ability in psychiatric disorders. *Nordic journal of psychiatry*. 2006;60(5):372-8.
23. Hill J, Harrington R, Fudge H, Rutter M, Pickles A. Adult personality functioning assessment (APFA). An investigator-based standardised interview. *The British journal of psychiatry : the journal of mental science*. 1989;155:24-35.
24. Mundo E, Bonalume L, Del Corno F, Madeddu F, Lang M. L'applicazione dell'Asse V di Kennedy a un campione clinico italiano. *Rivista di Psichiatria*. 2010;45(4).
25. Nozu M. [Evaluating work-personality insufficiency of schizophrenic patients; an assessment of employability in psychiatric rehabilitation]. *Seishin shinkeigaku zasshi = Psychiatria et neurologia Japonica*. 1995;97(4):217-38.
